# Supplementary material for: Global Expressions Landscape of NAC Transcription Factor Family and Their Responses to Abiotic Stresses in Citrullus lanatus
Source: PubMed Central journal article supplement (PMC4974498; doi:10.1038/srep30574), 2016-08-05
Supplement: srep30574-s1.pdf [file srep30574-s1.pdf]

# Global Expressions Landscape of NAC Transcription Factor Family and Their Responses to Abiotic Stresses in *Citrullus lanatus*

Xiaolong Lv<sup>1</sup>, Shanrong Lan<sup>1</sup>, Kateta Malangisha Guy<sup>1</sup>, Jinghua Yang<sup>1,2,3</sup>, Mingfang Zhang<sup>1,2,3</sup>, Zhongyuan Hu<sup>1,2,3,\*</sup>

<sup>1</sup> Laboratory of Germplasm Innovation and Molecular Breeding, College of Agriculture and Biotechnology, Zhejiang University, Hangzhou, 310058, P.R.China

<sup>2</sup> Key laboratory of Horticultural Plant Growth, Development & Quality Improvement, Ministry of Agriculture, Hangzhou, 310058, P.R.China

<sup>3</sup> Zhejiang Provincial Key Laboratory of Horticultural Plant Integrative Biology, Hangzhou, 310058, P.R.China

\* Corresponding author: Zhongyuan Hu

## Supplemental Figures and Tables

**Figure S1.** Phylogenetic tree of NAC proteins from watermelon, *Arabidopsis* and rice.

**Figure S2.** Protein structures of 12 pairs of duplicate genes from watermelon.

**Figure S3.** Protein structures of 30 pairs of putative orthologs of NAC TFs between watermelon and *Arabidopsis*.

**Figure S4.** Signal peptides predictions in 80 CINACs.

**Figure S5.** Phosphorylation site predictions in 80 CINACs.

**Table S1.** Sequence logos for the conserved motifs of watermelon NAC domain proteins.

**Table S3.** Number of different cis-elements presented in the promoter regions of the *CINAC* genes.

**Table S4.** Subcellular localization predictions for CINACs

**Table S5.** Phosphorylation site predictions in 80 CINACs.

**Table S6.** Primer sequences of *CINAC* genes for RT-PCR and qRT-PCR analyses.

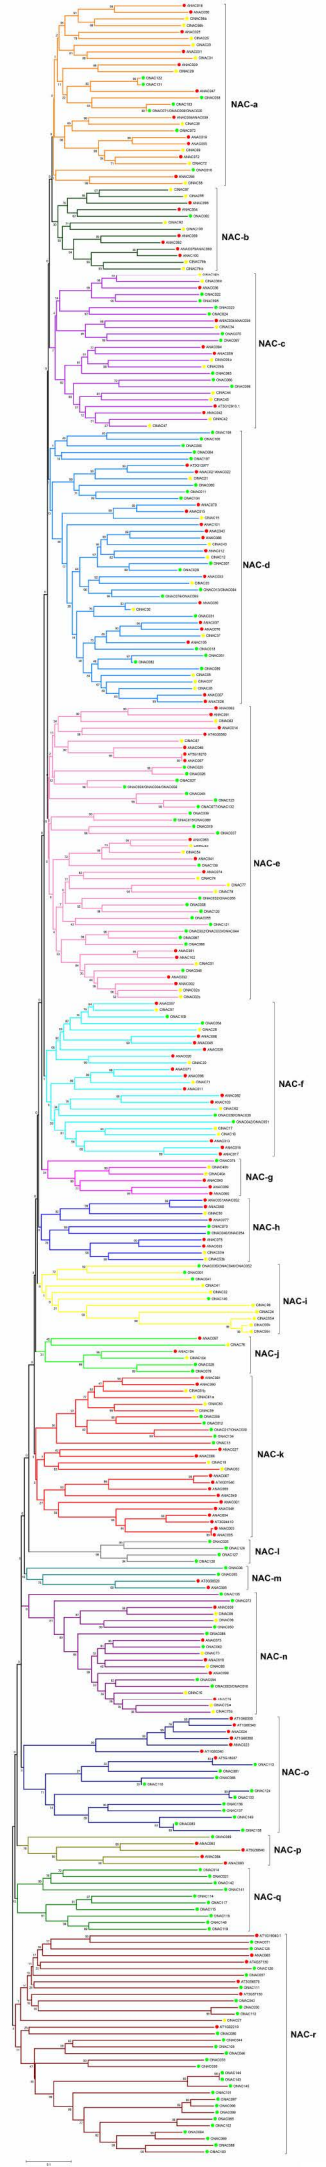

CINAC02a  
CINAC02b

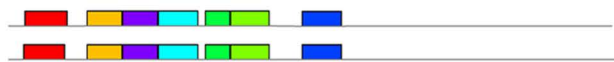

CINAC09a  
CINAC09b

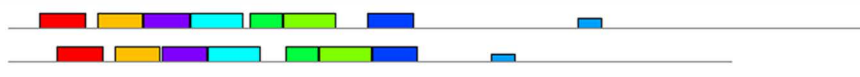

CINAC16  
CINAC17

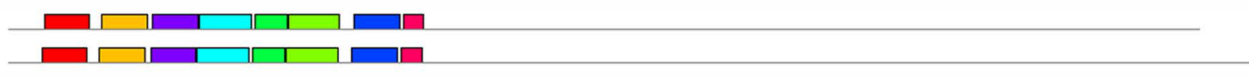

CINAC36a  
CINAC36b

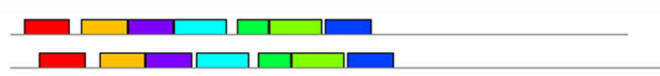

CINAC40a  
CINAC40b

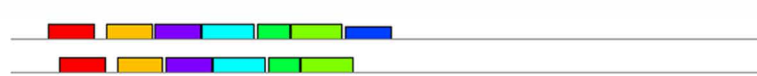

CINAC53a  
CINAC53b

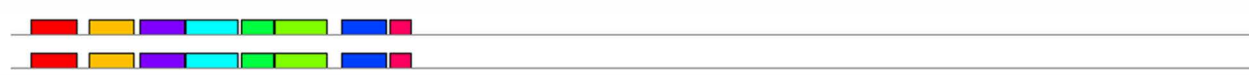

CINAC55a  
CINAC55b  
CINAC55c

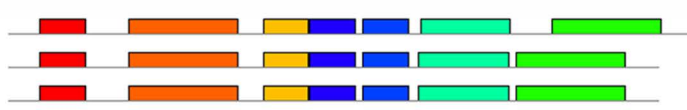

CINAC56a  
CINAC56b

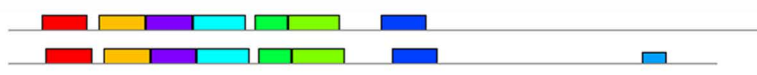

CINAC59a  
CINAC60b

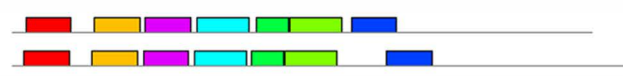

CINAC61a  
CINAC61b

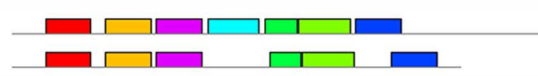

CINAC75a  
CINAC75b

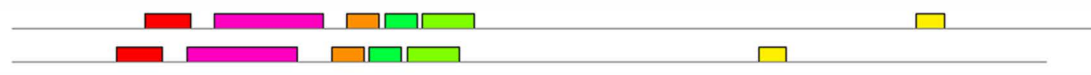

CINAC79b  
CINAC79a

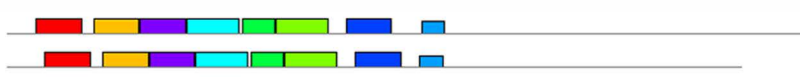

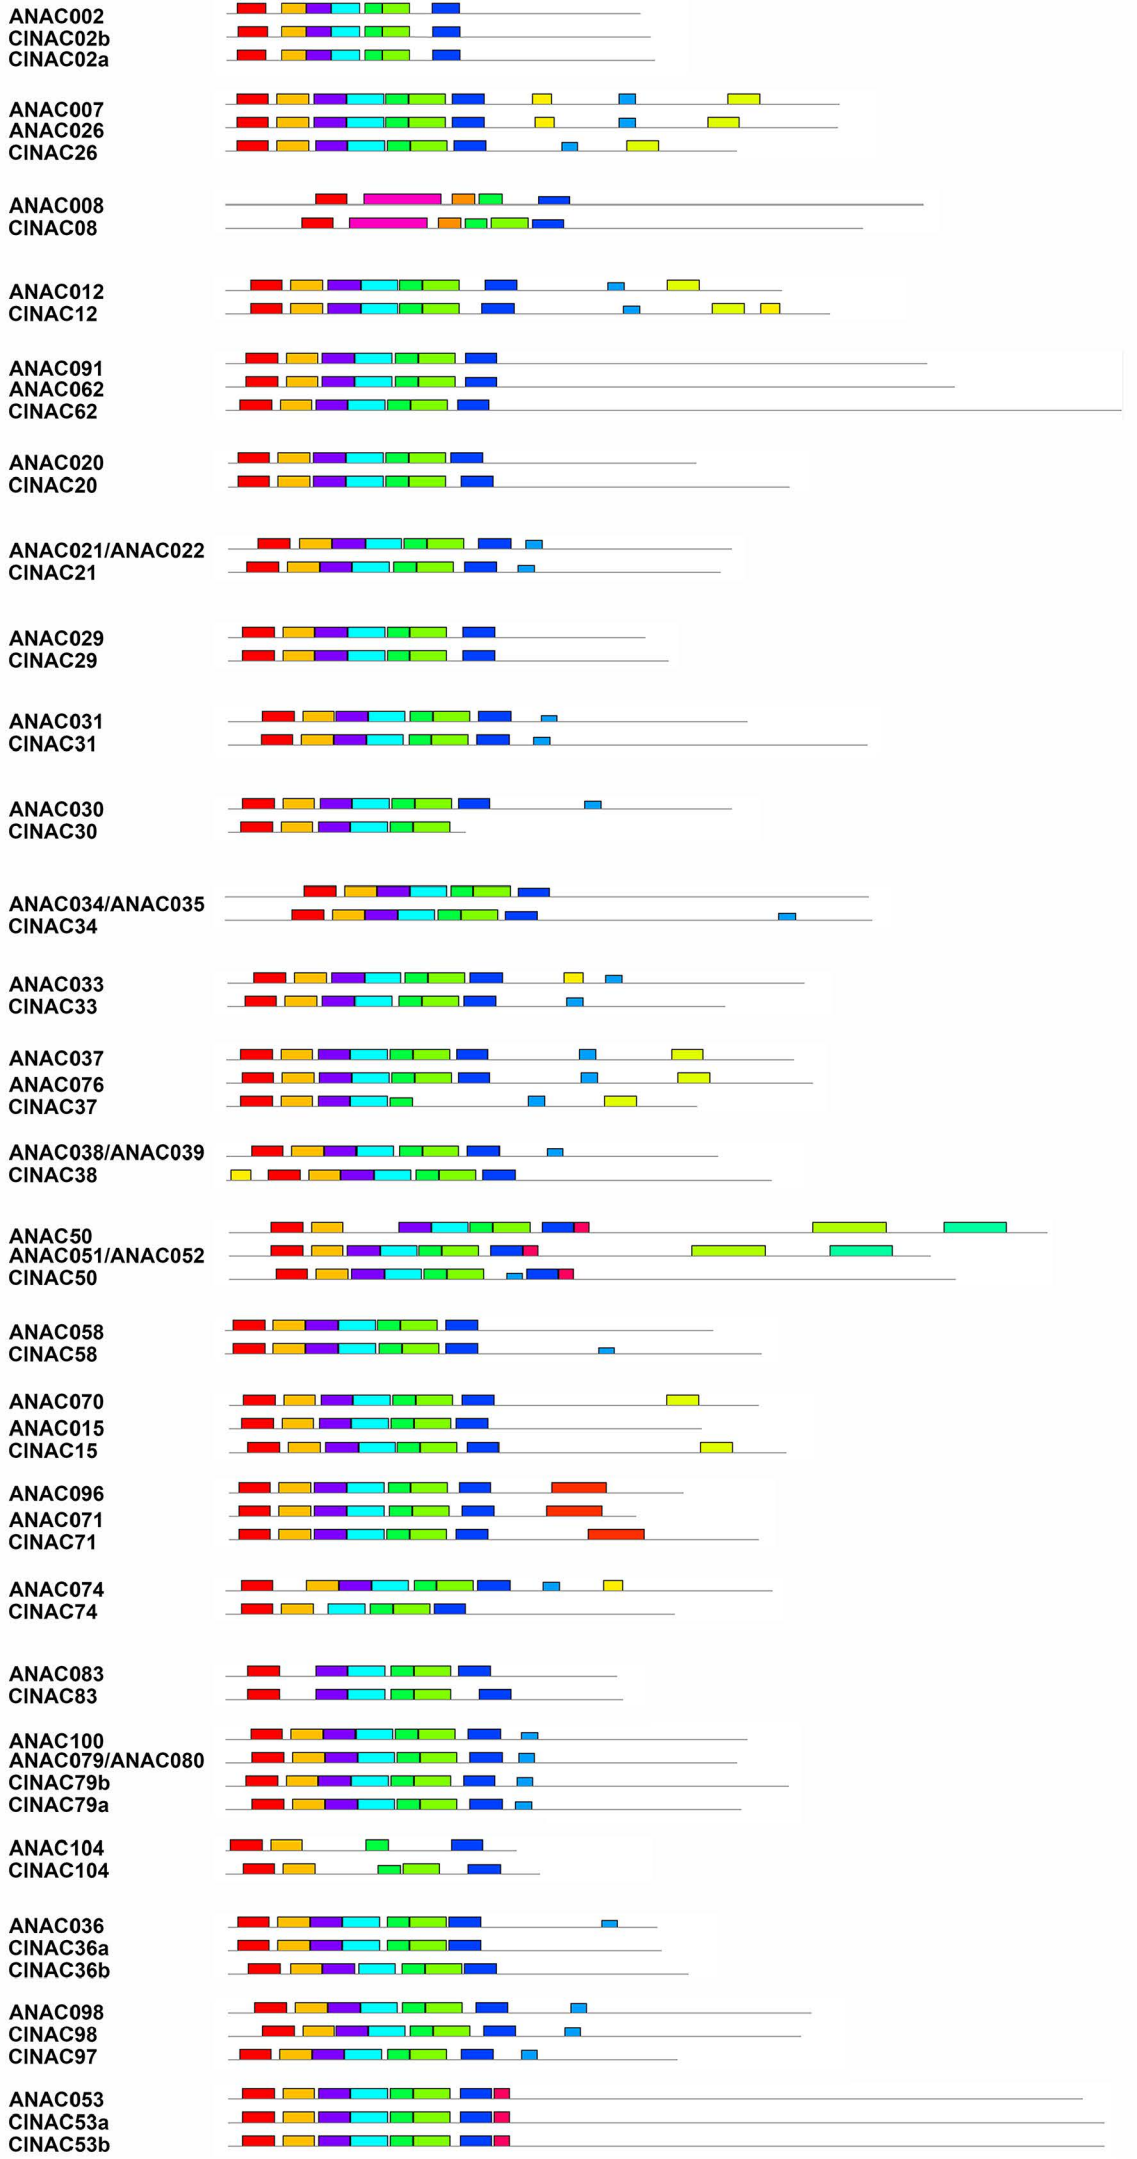

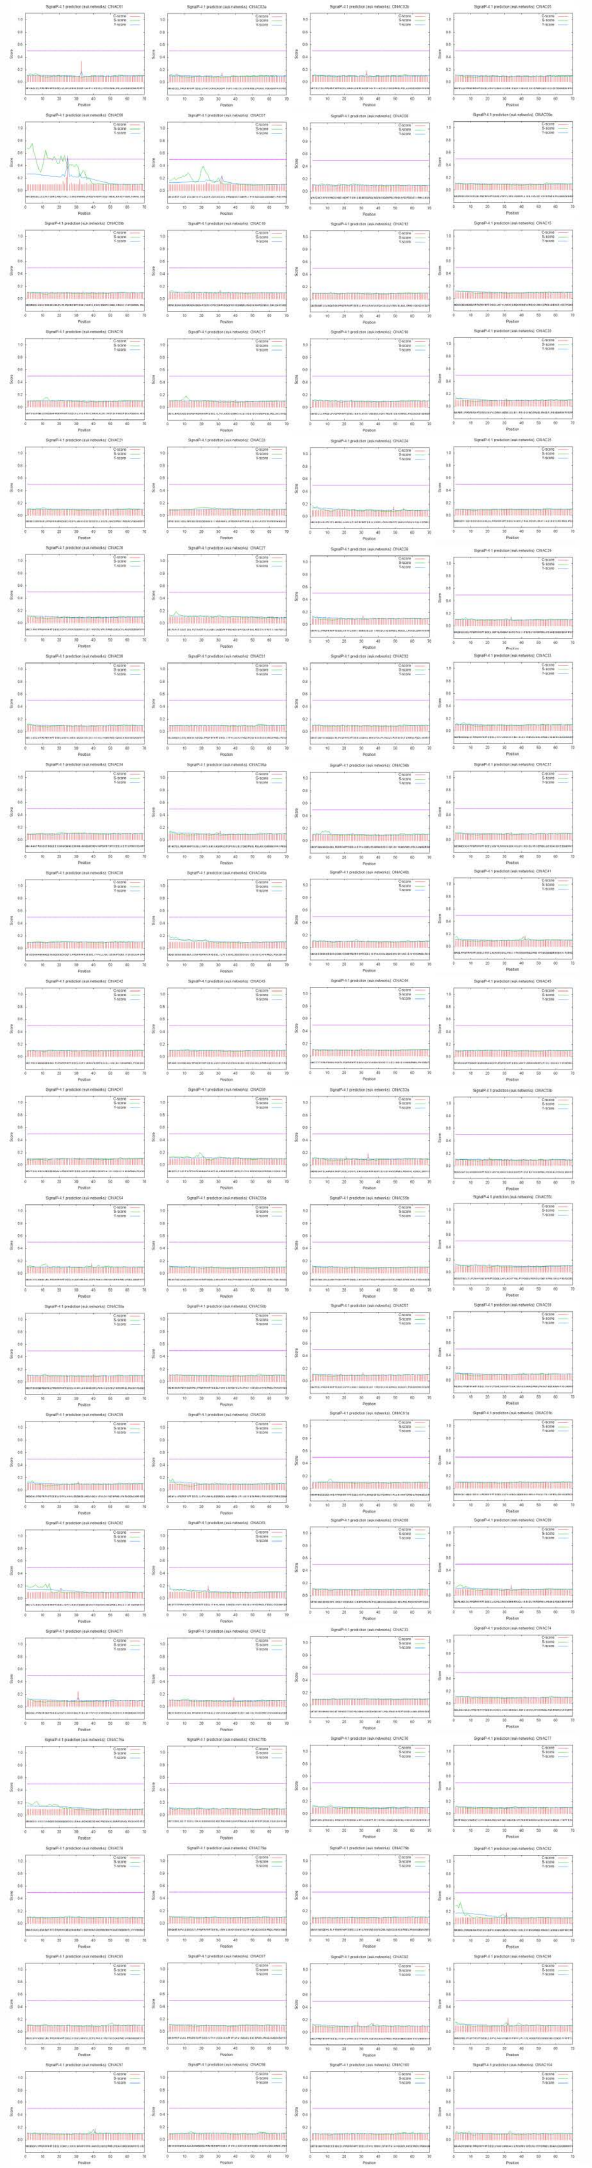

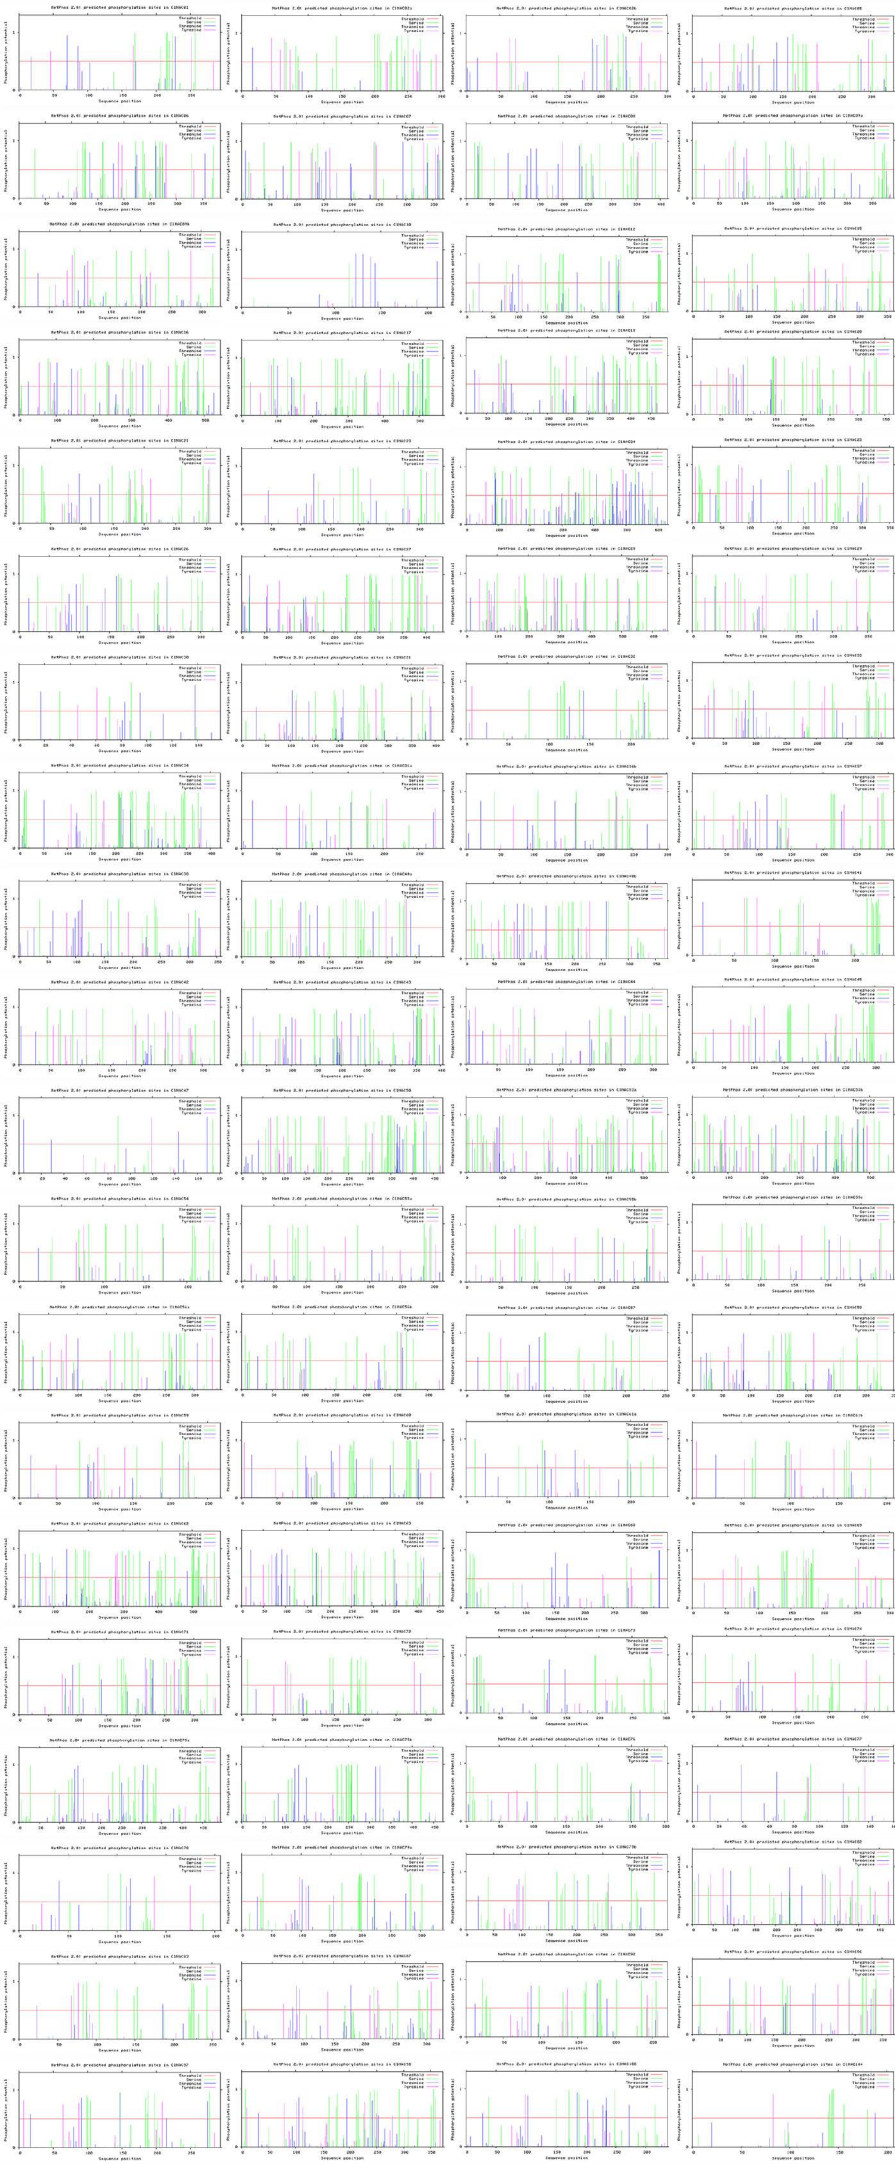

**Table S1. Sequence logos for the conserved motifs of watermelon NAC domain proteins.**

| Motif    | E-value   | Sites | Width | Logo |
|----------|-----------|-------|-------|------|
| Motif 1  | 4.2e-906  | 80    | 22    |      |
| Motif 2  | 1.9e-1031 | 77    | 20    |      |
| Motif 3  | 7.1e-876  | 60    | 21    |      |
| Motif 4  | 3.3e-619  | 65    | 21    |      |
| Motif 5  | 2.5e-482  | 74    | 15    |      |
| Motif 6  | 3.2e-403  | 62    | 15    |      |
| Motif 7  | 7.4e-368  | 71    | 21    |      |
| Motif 8  | 7.90E-110 | 7     | 34    |      |
| Motif 9  | 2.40E-82  | 4     | 50    |      |
| Motif 10 | 2.40E-49  | 3     | 50    |      |
| Motif 11 | 6.10E-49  | 7     | 21    |      |
| Motif 12 | 1.00E-43  | 3     | 50    |      |
| Motif 13 | 6.90E-42  | 4     | 29    |      |
| Motif 14 | 2.20E-38  | 7     | 15    |      |
| Motif 15 | 1.90E-26  | 5     | 15    |      |
| Motif 16 | 2.20E-24  | 47    | 6     |      |
| Motif 17 | 1.10E-20  | 7     | 16    |      |
| Motif 18 | 2.90E-20  | 5     | 14    |      |
| Motif 19 | 2.20E-13  | 47    | 8     |      |
| Motif 20 | 1.80E-08  | 5     | 8     |      |

Table S3. Number of different cis-elements presented in the promoter regions of the CINAC genes.

| Gene name | MBS | LTR | ABRE | TCA-element | HSE | ERE | ARE | TGACG-motif | CGTCA-motif |
|-----------|-----|-----|------|-------------|-----|-----|-----|-------------|-------------|
| CINAC01   | 1   |     | 1    |             | 1   | 1   |     | 1           | 1           |
| CINAC02a  | 1   |     | 4    |             | 1   |     | 1   | 4           | 4           |
| CINAC02b  | 1   |     | 7    | 1           | 2   | 1   | 3   | 1           | 1           |
| CINAC05   | 1   |     | 2    | 2           | 1   | 1   |     |             |             |
| CINAC06   | 1   |     |      |             |     |     | 2   |             |             |
| CINAC07   | 1   |     | 2    | 2           | 1   | 1   |     |             |             |
| CINAC08   |     |     |      |             | 1   |     | 3   | 1           | 1           |
| CINAC09a  |     |     | 1    | 1           | 1   | 2   |     |             |             |
| CINAC09b  |     |     |      |             | 1   |     |     |             |             |
| CINAC10   |     |     |      | 1           |     |     | 1   | 1           | 1           |
| CINAC12   |     |     |      | 3           |     | 1   | 1   |             |             |
| CINAC15   |     |     | 3    |             | 1   |     | 2   | 1           | 1           |
| CINAC16   |     | 1   |      |             |     | 2   |     | 1           | 1           |
| CINAC17   | 1   |     |      |             |     | 1   | 2   |             |             |
| CINAC18   |     | 1   |      |             |     | 1   |     |             |             |
| CINAC20   |     |     |      | 4           | 1   |     | 3   | 3           | 3           |
| CINAC21   | 1   |     | 1    | 2           |     |     |     | 1           | 1           |
| CINAC23   |     |     | 1    |             | 1   |     | 1   |             |             |
| CINAC24   |     |     |      |             | 1   | 1   | 1   | 2           | 2           |
| CINAC25   |     |     | 1    | 2           |     | 3   | 3   |             |             |
| CINAC26   | 1   |     |      |             | 2   | 1   | 5   |             |             |
| CINAC27   | 1   |     | 2    |             |     |     | 3   |             |             |
| CINAC28   |     | 1   |      | 3           |     |     |     |             |             |
| CINAC29   |     |     |      | 2           | 3   | 1   | 2   |             |             |
| CINAC30   | 1   | 1   | 1    | 1           | 1   |     | 2   |             |             |
| CINAC31   |     | 1   | 1    | 2           |     |     | 2   |             |             |
| CINAC32   |     |     | 1    | 1           |     | 2   |     | 1           | 1           |
| CINAC33   |     |     |      | 1           | 1   |     | 1   |             |             |
| CINAC34   |     |     |      | 4           | 1   |     |     | 1           | 1           |
| CINAC36a  | 2   | 1   |      |             | 1   | 2   | 1   |             |             |
| CINAC36b  | 1   |     |      | 1           |     | 1   | 1   |             |             |
| CINAC37   | 2   |     | 2    |             | 1   |     | 1   | 1           |             |
| CINAC38   |     | 1   |      |             | 1   | 1   | 1   |             |             |
| CINAC40a  |     |     | 1    |             |     |     | 1   | 1           | 1           |
| CINAC40b  | 2   |     | 2    |             | 1   |     | 1   | 1           | 1           |
| CINAC41   | 1   |     |      | 1           |     |     | 1   | 2           | 2           |
| CINAC42   |     |     |      | 1           | 2   |     | 2   |             |             |
| CINAC43   |     | 1   |      | 5           |     |     | 1   | 1           | 1           |
| CINAC44   |     | 1   |      | 1           | 2   |     |     | 1           | 1           |
| CINAC45   |     |     |      | 1           | 1   |     | 2   |             |             |
| CINAC47   | 2   |     | 1    |             | 1   | 1   |     | 1           | 1           |
| CINAC50   | 1   |     |      |             |     | 1   | 1   |             |             |
| CINAC53a  |     |     | 2    |             |     |     |     | 2           | 2           |
| CINAC53b  |     |     | 1    |             |     |     | 2   | 4           | 4           |
| CINAC54   |     |     |      |             | 2   |     |     |             |             |
| CINAC55a  |     |     |      |             |     |     | 1   |             |             |
| CINAC55b  |     | 1   |      | 1           | 2   |     | 1   | 1           | 1           |
| CINAC55c  |     | 1   | 1    | 1           |     | 1   | 1   | 2           | 2           |
| CINAC56a  |     |     | 3    |             | 1   | 1   |     | 2           |             |
| CINAC56b  | 3   |     | 1    |             | 2   |     |     | 1           | 1           |
| CINAC57   |     |     |      | 1           |     |     |     |             |             |
| CINAC58   |     |     |      | 1           | 1   |     |     |             |             |
| CINAC59   |     |     |      |             | 1   |     | 2   |             |             |
| CINAC60   |     |     |      | 1           |     |     | 1   |             |             |
| CINAC61a  | 1   |     |      | 1           |     |     | 1   | 1           |             |
| CINAC61b  |     |     |      | 1           | 1   |     |     |             |             |
| CINAC62   |     |     |      | 4           | 1   |     | 3   | 3           | 3           |
| CINAC63   |     |     |      | 1           |     |     | 2   | 1           | 1           |
| CINAC68   |     | 1   |      | 1           | 1   |     | 1   | 1           |             |
| CINAC69   |     |     | 8    |             |     |     | 2   | 2           |             |
| CINAC71   |     |     |      |             | 2   | 1   | 1   |             |             |
| CINAC72   |     |     | 3    |             | 1   |     | 3   | 2           | 2           |
| CINAC73   | 1   |     |      | 1           | 2   |     | 3   |             |             |
| CINAC74   | 1   |     | 1    | 1           |     |     | 1   | 2           | 2           |
| CINAC75a  | 1   |     | 2    | 3           | 1   |     | 1   |             |             |
| CINAC75b  | 1   |     |      | 1           |     |     | 3   |             |             |
| CINAC76   |     | 1   | 5    | 1           | 4   |     |     | 1           | 1           |
| CINAC77   | 1   | 2   |      | 1           |     | 1   | 1   |             |             |
| CINAC78   |     |     |      |             | 2   | 1   |     |             |             |
| CINAC79a  | 1   |     | 2    | 1           |     |     |     | 1           | 1           |
| CINAC79b  |     |     |      | 2           | 1   |     | 1   | 1           | 1           |
| CINAC82   | 3   |     |      | 2           |     |     |     |             |             |
| CINAC83   |     |     |      | 1           |     |     |     | 1           | 1           |
| CINAC87   |     | 1   |      | 1           | 1   | 2   |     |             |             |
| CINAC92   | 1   |     |      | 1           | 2   |     | 2   | 2           |             |
| CINAC96   | 2   |     | 1    | 1           |     |     |     | 3           | 3           |
| CINAC97   |     |     | 1    | 1           | 2   |     |     |             |             |
| CINAC98   |     |     |      |             | 1   |     | 1   | 1           | 1           |
| CINAC99   |     |     |      |             | 2   |     |     | 1           | 1           |
| CINAC100  |     |     |      |             |     |     | 1   | 2           | 2           |
| CINAC104  |     |     |      | 2           |     |     | 1   | 2           | 2           |



Table S4. Subcellular localization predictions for CINACs

| Protein name | Nucl | Cyto | Mito | Chlo | Vacu | Extr | Golg | Cysk | Plas | Pero |
|--------------|------|------|------|------|------|------|------|------|------|------|
| CINAC01      | 5    | 5    | 2    |      |      |      |      |      | 2    |      |
| CINAC02      | 4    | 6    |      | 1    |      |      |      |      |      | 2    |
| CINAC03      | 3    |      |      |      |      |      |      |      |      |      |
| CINAC04      | 3    | 2    | 4    | 3    | 1    |      |      |      |      |      |
| CINAC05      | 3    | 1    |      | 2    |      |      |      |      |      | 7    |
| CINAC06      | 4    | 3    |      |      |      |      |      |      |      | 6    |
| CINAC07      | 1    | 2    | 1    | 7    |      | 2    |      |      |      |      |
| CINAC08      | 4    | 6    |      |      |      |      |      |      | 2.5  |      |
| CINAC09      | 13   |      |      |      |      |      |      |      |      |      |
| CINAC10      | 8    | 4    |      | 1    |      |      |      |      |      |      |
| CINAC11      | 10   | 1    |      |      |      |      |      |      | 2    |      |
| CINAC12      | 9    | 2    |      | 1    | 1    |      |      |      |      |      |
| CINAC13      | 11   | 1    |      |      | 1    |      |      |      |      |      |
| CINAC14      | 8    |      | 1    | 2    |      |      | 2    |      |      |      |
| CINAC15      | 7    | 1    |      | 1    | 2    |      |      |      |      |      |
| CINAC16      | 4    | 2    |      | 5    |      |      |      |      | 2    |      |
| CINAC17      | 12   |      |      | 1    |      |      |      |      |      |      |
| CINAC18      | 14   |      |      |      |      |      |      |      |      |      |
| CINAC19      | 13   |      |      |      |      |      |      |      |      |      |
| CINAC20      | 3    |      | 1    |      | 1    |      | 1.5  |      | 6.5  |      |
| CINAC21      | 14   |      |      |      |      |      |      |      |      |      |
| CINAC22      | 12.5 |      |      |      |      |      |      |      |      |      |
| CINAC23      |      | 2    | 4    | 1    |      | 2    |      | 1    |      |      |
| CINAC24      | 13   |      |      |      |      |      |      |      |      |      |
| CINAC25      | 3    | 4    |      |      |      |      |      | 7    |      |      |
| CINAC26      | 9    | 2    |      | 1    |      | 1    |      |      |      |      |
| CINAC27      | 10   | 1    |      | 1    |      | 1    |      |      |      |      |
| CINAC28      | 11   |      |      | 2    |      |      |      |      |      |      |
| CINAC29      | 7    | 5    |      |      |      |      |      | 2    |      |      |
| CINAC30      | 12   | 1    |      |      |      |      |      |      |      |      |
| CINAC31      | 13   |      |      |      |      |      |      |      |      |      |
| CINAC32      | 6    | 3    | 2    |      |      |      |      |      |      | 2    |
| CINAC33      | 9    | 1    |      | 1    |      |      |      |      | 1.5  |      |
| CINAC34      | 6    | 5    | 1    | 1    |      |      |      |      |      |      |
| CINAC35      | 7    | 4    |      | 1    |      | 1    |      |      |      |      |
| CINAC36      | 10   | 3    |      |      |      |      |      |      |      |      |
| CINAC37      | 7    | 4    |      |      |      |      |      |      | 2    |      |
| CINAC38      | 14   |      |      |      |      |      |      |      |      |      |
| CINAC39      | 8.5  |      |      | 2    |      |      |      |      | 1.5  |      |
| CINAC40      | 3    | 1    |      | 8    |      |      |      |      | 1    |      |
| CINAC41      |      |      | 2    | 5    | 3    | 1    |      |      | 1    |      |
| CINAC42      | 6    | 4    | 1    | 2    |      |      |      |      |      |      |
| CINAC43      | 7    | 5    |      | 1    |      |      |      |      |      |      |
| CINAC44      | 2    | 10   |      | 2    |      |      |      |      |      |      |
| CINAC45      | 13   |      |      |      |      |      |      |      |      |      |
| CINAC46      | 14   |      |      |      |      |      |      |      |      |      |
| CINAC47      | 3    | 3    |      | 3    | 1    |      | 2    |      | 1    |      |
| CINAC48      | 12   |      | 1    |      |      |      |      |      |      |      |
| CINAC49      | 12   |      |      | 1    |      |      |      |      |      |      |
| CINAC50      | 3    | 1    | 1    | 3    |      | 1    |      | 1    | 3    |      |
| CINAC51      | 11   | 1    |      | 1    |      |      |      |      |      |      |
| CINAC52      | 13   |      |      |      |      |      |      |      |      |      |
| CINAC53      | 13   |      |      |      |      |      |      |      |      |      |
| CINAC54      | 12   |      | 1    |      |      |      |      |      |      |      |
| CINAC55      | 13   |      |      |      |      |      |      |      |      |      |
| CINAC56      | 12   |      |      |      |      |      |      |      | 1    |      |
| CINAC57      | 9    | 2    |      | 2    |      |      |      |      |      |      |
| CINAC58      |      | 13   |      |      |      |      |      |      |      |      |
| CINAC59      | 1    | 11   | 1    |      |      |      |      |      |      |      |
| CINAC60      |      | 2    |      | 9    |      |      |      |      |      | 2    |
| CINAC61      | 5    | 4    | 1    |      | 1    |      |      |      | 2    |      |
| CINAC62      | 14   |      |      |      |      |      |      |      |      |      |
| CINAC63      | 12   |      | 2    |      |      |      |      |      |      |      |
| CINAC64      | 4    | 1    |      | 8    |      |      |      |      |      |      |
| CINAC65      | 8    | 3    | 1    | 1    |      |      |      |      |      |      |
| CINAC66      | 12   |      |      | 2    |      |      |      |      |      |      |
| CINAC67      | 10   | 1    | 2    |      |      |      |      |      |      |      |
| CINAC68      | 7    | 4    |      |      |      |      |      | 2    |      |      |
| CINAC69      | 13   |      |      |      |      |      |      |      |      |      |
| CINAC70      | 5    | 4    | 2    | 2    |      |      |      |      |      |      |
| CINAC71      | 9    |      |      | 1    | 1    | 1    |      |      | 1    |      |
| CINAC72      | 9    |      |      | 2    |      | 2    |      |      |      |      |
| CINAC73      | 5    | 2    |      | 1    |      | 4    |      |      |      |      |
| CINAC74      | 13   |      |      |      |      |      |      |      |      |      |
| CINAC75      | 8    | 1    | 2    | 2    |      |      |      |      |      |      |
| CINAC76      | 6    | 3    | 1    | 1    |      |      |      |      |      | 2    |
| CINAC77      | 11   |      |      | 1    |      | 1    |      |      |      |      |
| CINAC78      | 10   | 1    |      | 2    |      |      |      |      |      |      |
| CINAC79      | 6    | 1    | 4.5  | 1    |      |      |      |      |      |      |
| CINAC80      | 3    | 6    | 2    | 2    |      |      |      |      |      |      |

Nucl: nucleus; Cyto: cytoplasm; Mito: mitochondria; Chlo: chloroplast; Plas: plasma membrane; extr: extracellular; Pero: peroxisome; Vacu: vacuole; Cysk: cytoskeleton; Golg: golgiosome.

Table S5. Phosphorylation site predictions in 80 CINACs.

| Protein name | Ser | Thr | Tyr |
|--------------|-----|-----|-----|
| CINAC01      | 8   | 4   | 3   |
| CINAC02      | 6   | 4   | 7   |
| CINAC03      | 18  | 3   | 8   |
| CINAC04      | 10  | 9   | 9   |
| CINAC05      | 11  | 7   | 4   |
| CINAC06      | 14  | 7   | 2   |
| CINAC07      | 17  | 6   | 5   |
| CINAC08      | 16  | 9   | 2   |
| CINAC09      | 16  | 5   | 4   |
| CINAC10      | 9   | 3   | 6   |
| CINAC11      | 1   | 5   | 0   |
| CINAC12      | 16  | 6   | 1   |
| CINAC13      | 22  | 6   | 8   |
| CINAC14      | 29  | 7   | 2   |
| CINAC15      | 21  | 9   | 3   |
| CINAC16      | 30  | 6   | 6   |
| CINAC17      | 19  | 4   | 8   |
| CINAC18      | 15  | 2   | 5   |
| CINAC19      | 16  | 7   | 5   |
| CINAC20      | 22  | 6   | 9   |
| CINAC21      | 23  | 8   | 4   |
| CINAC22      | 10  | 2   | 6   |
| CINAC23      | 3   | 4   | 2   |
| CINAC24      | 16  | 17  | 5   |
| CINAC25      | 7   | 4   | 0   |
| CINAC26      | 14  | 6   | 4   |
| CINAC27      | 14  | 4   | 4   |
| CINAC28      | 27  | 6   | 2   |
| CINAC29      | 8   | 6   | 5   |
| CINAC30      | 8   | 4   | 2   |
| CINAC31      | 12  | 6   | 4   |
| CINAC32      | 9   | 7   | 4   |
| CINAC33      | 15  | 6   | 6   |
| CINAC34      | 20  | 5   | 3   |
| CINAC35      | 11  | 4   | 8   |
| CINAC36      | 12  | 7   | 5   |
| CINAC37      | 20  | 2   | 5   |
| CINAC38      | 2   | 4   | 1   |
| CINAC39      | 20  | 8   | 4   |
| CINAC40      | 26  | 7   | 4   |
| CINAC41      | 30  | 6   | 8   |
| CINAC42      | 9   | 2   | 6   |
| CINAC43      | 10  | 3   | 4   |
| CINAC44      | 8   | 2   | 4   |
| CINAC45      | 15  | 4   | 5   |
| CINAC46      | 14  | 3   | 5   |
| CINAC47      | 27  | 9   | 7   |
| CINAC48      | 10  | 3   | 1   |
| CINAC49      | 13  | 5   | 3   |
| CINAC50      | 19  | 11  | 3   |
| CINAC51      | 13  | 3   | 3   |
| CINAC52      | 17  | 8   | 5   |
| CINAC53      | 10  | 1   | 3   |
| CINAC54      | 20  | 1   | 6   |
| CINAC55      | 12  | 3   | 1   |
| CINAC56      | 7   | 5   | 2   |
| CINAC57      | 10  | 2   | 2   |
| CINAC58      | 3   | 4   | 2   |
| CINAC59      | 3   | 3   | 2   |
| CINAC60      | 7   | 3   | 2   |
| CINAC61      | 16  | 6   | 0   |
| CINAC62      | 19  | 5   | 1   |
| CINAC63      | 15  | 2   | 2   |
| CINAC64      | 12  | 3   | 1   |
| CINAC65      | 13  | 2   | 4   |
| CINAC66      | 16  | 2   | 2   |
| CINAC67      | 8   | 4   | 5   |
| CINAC68      | 8   | 5   | 4   |
| CINAC69      | 15  | 9   | 3   |
| CINAC70      | 8   | 6   | 2   |
| CINAC71      | 8   | 2   | 5   |
| CINAC72      | 17  | 4   | 3   |
| CINAC73      | 12  | 6   | 6   |
| CINAC74      | 16  | 6   | 6   |
| CINAC75      | 11  | 5   | 4   |
| CINAC76      | 7   | 8   | 1   |
| CINAC77      | 14  | 7   | 2   |
| CINAC78      | 15  | 3   | 3   |
| CINAC79      | 9   | 6   | 7   |
| CINAC80      | 7   | 1   | 1   |

**Table S6. Primer sequences of CINAC genes for RT-PCR and qRT-PCR analyses.**

| Gene symbol     | Primer                 |                       |
|-----------------|------------------------|-----------------------|
|                 | F                      | R                     |
| <i>CINAC01</i>  | AGAATGCACACCGACTCCTC   | TTGGGTTGACTTTGGACCTC  |
| <i>CINAC02a</i> | AAGGGCGTAATCGAGAAACA   | GAAACTGCCCTTTCGTTACG  |
| <i>CINAC02b</i> | CAATACCGCGATTACACACG   | TTCCAATTCCTTCCATTTTCG |
| <i>CINAC05</i>  | AAATGCCACTCCACAGGAAG   | GTTCCTCGTACCAACACGGT  |
| <i>CINAC06</i>  | GAATCCTCCGATTCCACCTC   | TGCAATGACTGAGGCAGAC   |
| <i>CINAC07</i>  | CTTTGCAAGCATGAGGTTGA   | CATAGGTGCACGACAAGACG  |
| <i>CINAC08</i>  | TTGATCCTGCAAAACATCGAA  | CCGAAATCAAGCTGGCTAAG  |
| <i>CINAC09a</i> | TGGATGATGCATGAATTTTCG  | TCTTTGAGCTGTGGAGTTGG  |
| <i>CINAC09b</i> | CGTGGACAGGAGAGAAGGAG   | TGGGACGATCAGTTCAGTA   |
| <i>CINAC10</i>  | CAAAGATTCATCCACTCATCCA | TGTCGGATTTCACCATCTTTC |
| <i>CINAC12</i>  | GACGAAAGAGCCATGGAAGA   | CTCATGCCATATCCCAATC   |
| <i>CINAC15</i>  | ATGTTGGATCGGCTCGTTAC   | TCACTGATGACGACCCATGT  |
| <i>CINAC16</i>  | AATGATGGAGGTGGTTCTGC   | GATGCAGGAGTGGTCGGTAT  |
| <i>CINAC17</i>  | ACTCCTTATCCCTGGGTGCT   | GCTGCTGCTCGGAATTAGAC  |
| <i>CINAC18</i>  | CAACTGGGAGGAGCTCTTTG   | CCAGCTTAAACCCGTATCCA  |
| <i>CINAC20</i>  | TTACATTGATTGCCCTTCA    | CGAGCTCTAATGGCGGATAG  |
| <i>CINAC21</i>  | AGTACGCGACTGGCTTAGA    | ACGAGCTGATTGGCCTTAGT  |
| <i>CINAC23</i>  | GCCTCGAAAGCTTCATCATC   | ATAGTTCGTGTCGGTCGCTT  |
| <i>CINAC24</i>  | GCCTGAGATGAAGCAGGGTA   | CGCCATAACACATCATCAG   |
| <i>CINAC25</i>  | CCACCGACGAGGAATTAGTG   | GTCCCATGGATCGAATTGT   |
| <i>CINAC26</i>  | GAGCTCGATTCTCCAACCAC   | AGTGCAACTCGAGCTCTTGC  |
| <i>CINAC27</i>  | ATTAACCAGGACAGGGCACA   | CTTGATGCACCACCTCCTTC  |
| <i>CINAC28</i>  | TTTGATGTGGAAGCTCGTG    | TTCCATGCAATCTTGTGGA   |
| <i>CINAC29</i>  | GGCTTCAGATTTCAACCAAC   | TTATGGAACAGGACATGGCT  |
| <i>CINAC30</i>  | AAATTTGGTTACGAGGAGCAAA | ACTGCCATTATCCCTCCCTGT |
| <i>CINAC31</i>  | GAGACCGGAAATACCCAACA   | GGGATCCATTTGAAGCACTG  |
| <i>CINAC32</i>  | TAAGCCAAGGGATCAACCAG   | TGAGTTGGGAGTTGTTGCAG  |
| <i>CINAC33</i>  | CGCAGCTGTTTAGTCCAGAG   | CCGCAACTTAACCTCCAGAT  |
| <i>CINAC34</i>  | GCTTCCATCCCACTGAAGAA   | AAGCTCCCAAGGGTCATAGC  |
| <i>CINAC36a</i> | AAGAGGCTGCAGTTTATCC    | CTCTCCAATCCTTGCCAATC  |
| <i>CINAC36b</i> | GGCGAAGAATGGTGAGAGAG   | CTTCCAGTACCCAATTCGG   |
| <i>CINAC37</i>  | AGCAAGAGATGGAACAAGCTG  | TCTTCATTGCACTCGGACAC  |
| <i>CINAC38</i>  | TTGGAATGAAGAAGACGTTGG  | CACCCATTGCTCCTTAGCTG  |
| <i>CINAC40a</i> | AAGGCGGCTTCGAGTAAAGT   | AATTTGCTCCAGCGAATGAG  |
| <i>CINAC40b</i> | TGCTTCGGATCCTTTACCAC   | GCAGAACCTTGGTTCCGGTAG |
| <i>CINAC41</i>  | CTGCCTTGCCTGCTTCTATC   | CCTGGCCTGTAGGAATATC   |
| <i>CINAC42</i>  | CGTCTCCCTCCTCTAATCC    | TCTGCTTCTGGGCAAAGTT   |
| <i>CINAC43</i>  | AAGTACCGACTGGAACCTCG   | CAAGCGTCTTCTCATTCCA   |
| <i>CINAC44</i>  | TCATTGCATTGGCTAAAGA    | GGCGAAGTGAAGTGGAAAC   |
| <i>CINAC45</i>  | ACAGTGTGAGGCCAACAGAG   | GCCTTTACCAGCAGATCCAC  |
| <i>CINAC47</i>  | AAAGTGAGCAATGTGGGAGA   | TGTAATGCCTGTTGCTTTC   |
| <i>CINAC50</i>  | GACCTCCAATGGACATCGT    | CCGTCTGCAATCTTCTTCC   |
| <i>CINAC53a</i> | CGCAGATGGTGATAATGCAG   | CAGTGTGTTTGTGGCAGAT   |
| <i>CINAC53b</i> | AAACAATCGTCCATGGCTTC   | CTGGCACGTTTCAAGAATGA  |
| <i>CINAC54</i>  | GGCTCAAGAACTGATTGGGT   | CCGTCAATAAGGTGGAAGG   |
| <i>CINAC55a</i> | CGTCAAATTTAGGCCTACCG   | GCTCGGTTCCACCATAAAGA  |
| <i>CINAC55b</i> | CGTCAAATTTAGGCCTACCG   | GCTCGGTTCCACCATAAAGA  |
| <i>CINAC55c</i> | TGCCATTGAACCATACGTG    | GCTCGGTTCCACCATAAAGA  |
| <i>CINAC56a</i> | ATGGAGAGCACCGACTCGT    | GAACCACGAGCTTTCATCG   |
| <i>CINAC56b</i> | CTTCCAGCTAAGGCGAGCTA   | TTCCAGTGCCTTCCAATAC   |
| <i>CINAC57</i>  | GATGGCAGCTTCATCTTCTG   | GCTGATGAATTGGAAGCACA  |
| <i>CINAC58</i>  | CGATGGGAGAGAAAGATGG    | GACCAGTGCCAAAGATTCC   |
| <i>CINAC59</i>  | CGGTGCAAGAGAGATGAAGA   | CCAGTTGCTTCCAATAGCC   |
| <i>CINAC60</i>  | CTCAGTTCGCTGCTGGAAG    | GAGCGATTGAGTTGGGTTA   |
| <i>CINAC61a</i> | AACCAAATGGAAGATGAACGA  | AAAGCATCCGGAAATCACAT  |
| <i>CINAC61b</i> | GAGCCGTTCAATCTCTCCAG   | CCTTCCAATACCCAGATCCA  |
| <i>CINAC62</i>  | ATGCAGAGTCCAGGACGAGT   | AAGGATTGAAGGTGGCAGTG  |
| <i>CINAC63</i>  | GAACCAACAAAGTATCGCA    | TCTGGGTGAAGGTGATACTCG |
| <i>CINAC68</i>  | ATCCTGTGGCCATCAGATTG   | ATTTCACTCCAGCTGGCAAC  |
| <i>CINAC69</i>  | GACGATTTCTTCGCTATCC    | GTTCCGGCACTGAGTAGAGC  |
| <i>CINAC71</i>  | TCGTCTCAGACCAATTTCTCTG | CGTGCTATACCGAGACATGG  |
| <i>CINAC72</i>  | GCAACCACTGAGGAACACG    | GGAGTTGGAGAACTTTGCG   |
| <i>CINAC73</i>  | AGCCAGAGAAGACAACCTGGA  | TGGAGTGAGTTCACACATTG  |
| <i>CINAC74</i>  | ACTTCGAGCGTGTCCATCT    | TTGTAGTCAACAAGGCATCGC |
| <i>CINAC75a</i> | AATTGGTTCGGAGAGAGCCT   | TCTCCCGTCGACTCAAATTC  |
| <i>CINAC75b</i> | CTCCTCTCCACCATCTCTCA   | AAGCAGACCTCCCTCCTAGC  |
| <i>CINAC76</i>  | AGGGAGAACAGAGGACGGAT   | CTCCTCTCATCCCAAGCAC   |
| <i>CINAC77</i>  | TCACACTTTCCGTTTGATGC   | CAGCCCATTTGAGTCGTTG   |
| <i>CINAC78</i>  | TGGCAAAGCTAAATGGGAAG   | TCCAGTTGCTTCCAATATCC  |
| <i>CINAC79a</i> | GCCATTGAAGGATTCCTCTTC  | ATCCATGGTGTGGAGAAGC   |
| <i>CINAC79b</i> | ATCGCCATGGATTCTCAAAG   | TTGGCGGTGAATACATTGAA  |
| <i>CINAC82</i>  | TTTGAAGATGCAGCTCAGA    | TCAACCTCCTCCAGACCATC  |
| <i>CINAC83</i>  | TTTCTTCAGCACGAGAGAAGC  | TCTTCAACCCCAACCATTGA  |
| <i>CINAC87</i>  | GGAAGCAACACTTCCATCGT   | TTATCGACGTAGTCCCACCAG |
| <i>CINAC92</i>  | AGAGCAACAGTCGCTTCTCAG  | GTTGTTGACATCGGTGGTGA  |
| <i>CINAC96</i>  | AGTTGGATGGAGTCGGAGTG   | TGCTGCTTCCAATGCTACAG  |
| <i>CINAC97</i>  | AACCGGTTGAGAACGAAC     | TTGGAGCTCTGCCTTTGTAGA |
| <i>CINAC98</i>  | AGAGGAAGAGCACCCAAAGG   | CCCTTGAAATCACCCACTCA  |
| <i>CINAC100</i> | TGGAAGACGCAGAATGAGTG   | CGATGGCAGTGAATGGTA    |
| <i>CINAC104</i> | CGCCTCTCTCTCTCTCTCT    | TCATCCAAACACGACAGCTC  |
